# Supplementary material
Source: publisher figshare collection journal article supplement (https://rs.figshare.com/ndownloader/files/14132063)
Supplement: Supplementary file 1 [file 14132063]

## Sheet: Sheet1
Table S12. Results of ancestral state reconstruction. 19 morphological characters and their inferred state distributions for 19 selected ancestral nodes. Numbers indicate states defined in the character description; numbers in parenthesis indicate an ambiguous inference of multiple, equally parsimonious states.
Character\Node		Dictyoptera	Mantodea	Blattodea	Blaberoidea	Blaberoidea excl. Ectobius	Anallacta + Pseudophyllodromiinae	Pseudophyllodromiinae	Blaberidae	Nyctibora + Blattellinae	Blatellinae	Solumblattodea	Corydioidea	Corydiidae s.s.	Blattoidea	Kittrickea	Tutricablattae	Isoptera	Blattoidae	Blattidae
1	Body size (anterior margin of head - posterior margin of last segment, without cerci or other appendages) in mm: (0) smaller than 6.5; (1) 6.5-15; (2) 15-30; (3) above 30	2	2	2	(1 2)	(1 2)	(1 2)	1	2	(1 2 3)	(1 2)	2	2	2	2	2	2	2	2	2
2	Ratio between body length and maximum width: (0) smaller than 2; (1) 2-2.5; (2) 2.6-3.5; (3) 3.5-5; (4) above 5	2	4	2	1	1	1	1	1	1	1	2	2	0	2	2	2	2	1	1
3	Maternal brood care: (0) absent; (1) present	0	0	0	0	(0 1)	(0 1)	(0 1)	1	(0 1)	(0 1)	0	0	0	0	0	1	1	0	0
4	Long-lasting biparental care: (0) absent; (1) present	0	0	0	0	0	0	0	0	0	0	0	0	0	0	0	1	1	0	0
5	Eusociality: (0) absent, (1) present	0	0	0	0	0	0	0	0	0	0	0	0	0	0	0	0	1	0	0
6	Mode of reproduction: (0) Oviparity; (1) false ovoviviparous or false viviparous; (2) viviparity	0	0	0	0	0	0	0	1	0	0	0	0	0	0	0	0	0	0	0
7	Ootheca: presence (1) or absence (0)	1	1	1	1	1	1	1	1	1	1	1	1	1	1	1	1	1	1	1
8	Ootheca: (0) deposited; (1) carried around	0	0	0	0	0	0	0	1	0	0	0	0	0	0	0	0	0	0	0
9	Ootheca deposition: (0) laid directly into dug hole; (1) laid first, hole prepared, then ootheca moved into hole; (2) laid and ignored.	0	0	0	0	0	0	0	0	0	0	0	(0 2)	(0 2)	0	1	1	1	0	0
10	Advanced rotation of ootheca in vestibulum; (0) absent; (1) present.	0	0	0	0	0	0	0	1	1	1	0	0	0	0	0	0	0	0	0
11	Postition of the ootheca during formation: (0) outside the body; (1) inside the body	(0 1)	0	1	1	1	1	1	1	1	1	1	1	1	1	1	1	1	1	1
12	Orientation of phallomere asymmetry; [0] normal: left complex on left side, right phallomere on right side; [1] reversed: left complex on right side, right phallomere on left side.	0	0	0	0	(0 1)	1	1	1	0	0	0	0	0	0	0	0	0	0	0
13	Symetry of external genitalia: (0) strongly asymmetrical; (1) (almost) bilaterally symmetrical (including virtual absence). External genitalia refers to the genital phallomeres (not paraprocts or subgenital plate, or supraanal plate)	0	0	0	0	0	0	0	0	0	0	0	0	0	0	0	0	1	0	0
14	Nest (built galleries): (0) absent; (1) present	0	0	0	0	0	0	0	0	0	0	0	0	0	0	0	1	1	0	0
15	Wings: (0) absent; (1) present	1	1	1	1	1	1	1	1	1	1	1	1	1	(0 1)	(0 1)	(0 1)	1	(0 1)	1
16	Wings: (0) cannot be dropped; (1) can be dropped.	0	0	0	0	0	0	0	0	0	0	0	0	0	0	(0 1)	(0 1)	1	0	0
17	Anal field of hindwing folding: (0) folding simple; (1) folded fan-like	1	1	1	1	1	1	1	1	1	1	(0 1)	0	0	(0 1)	(0 1)	(0 1)	(0 1)	(0 1)	1
18	Tegminization of forewings; [0] absent; [1] present	1	1	1	1	1	1	1	1	1	1	1	1	1	1	(0 1)	(0 1)	0	1	1
19	Number of ocelli: (0) zero; (1) two; (2) three	2	2	1	1	1	1	1	1	1	1	1	1	1	1	1	1	1	1	1
